# Hypocretin (orexin) cell loss in Parkinson's disease\*

Thomas C. Thannickal,<sup>1,2,3,†</sup> Yuan-Yang Lai<sup>1,2,3,†</sup> and Jerome M. Siegel<sup>1,2,3</sup>

<sup>1</sup>Department of Psychiatry, University of California at Los Angeles, Los Angeles, CA 90095, <sup>2</sup>Neurobiology Research (15IA3), Veterans Administration Greater Los Angeles Healthcare System, North Hills, CA 91343 and <sup>3</sup>Brain Research Institute, University of California at Los Angeles, Los Angeles, CA 90095, USA

\*An abstract of this work was submitted to the Society for Neuroscience annual meeting on May 15, 2006 and presented at the Society for Neuroscience meeting in Atlanta on October 15, 2006.

†These authors contributed equally to this work.

Correspondence to: Jerome M. Siegel, PhD, UCLA/VAGLAHS – Sepulveda, Neurobiology Research (15IA3), 16111 Plummer Street, North Hills, CA 91343, USA  
E-mail: jsiegel@ucla.edu

It has recently been reported that Parkinson's disease (PD) is preceded and accompanied by daytime sleep attacks, nocturnal insomnia, REM sleep behaviour disorder, hallucinations and depression, symptoms which are frequently as troublesome as the motor symptoms of PD. All these symptoms are present in narcolepsy, which is linked to a selective loss of hypocretin (Hcrt) neurons. In this study, the Hcrt system was examined to determine if Hcrt cells are damaged in PD. The hypothalamus of 11 PD (mean age  $79 \pm 4$ ) and 5 normal (mean age  $77 \pm 3$ ) brains was examined. Sections were immunostained for Hcrt-1, melanin concentrating hormone (MCH) and alpha synuclein and glial fibrillary acidic protein (GFAP). The substantia nigra of 10 PD brains and 7 normal brains were used for a study of neuromelanin pigmented cell loss. The severity of PD was assessed using the Hoehn and Yahr scale and the level of neuropathology was assessed using the Braak staging criteria. Cell number, distribution and size were determined with stereologic techniques on a one in eight series.

We found an increasing loss of hypocretin cells with disease progression. Similarly, there was an increased loss of MCH cells with disease severity. Hcrt and MCH cells were lost throughout the anterior to posterior extent of their hypothalamic distributions. The percentage loss of Hcrt cells was minimal in stage I (23%) and was maximal in stage V (62%). Similarly, the percentage loss of MCH cells was lowest in stage I (12%) and was highest in stage V (74%). There was a significant increase ( $P = 0.0006$ ,  $t = 4.25$ ,  $df = 15$ ) in the size of neuromelanin containing cells in PD patients, but no difference in the size of surviving Hcrt ( $P = 0.18$ ,  $t = 1.39$ ,  $df = 14$ ) and MCH ( $P = 0.28$ ,  $t = 1.39$ ,  $df = 14$ ) cells relative to controls.

In summary, we found that PD is characterized by a massive loss of Hcrt neurons. Thus, the loss of Hcrt cells may be a cause of the narcolepsy-like symptoms of PD and may be ameliorated by treatments aimed at reversing the Hcrt deficit. We also saw a substantial loss of hypothalamic MCH neurons. The losses of Hcrt and MCH neurons are significantly correlated with the clinical stage of PD, not disease duration, whereas the loss of neuromelanin cells is significantly correlated only with disease duration. The significant correlations that we found between the loss of Hcrt and MCH neurons and the clinical stage of PD, in contrast to the lack of a relationship of similar strength between loss of neuromelanin containing cells and the clinical symptoms of PD, suggests a previously unappreciated relationship between hypothalamic dysfunction and the time course of the overall clinical picture of PD.

**Keywords:** Parkinson; narcolepsy; sleep; hypocretin; orexin; melanin concentrating hormone

**Abbreviations:** GFAP = glial fibrillary acidic protein; Hcrt = hypocretin; MCH = melanin concentrating hormone; PD = Parkinson's disease

Received December 14, 2006. Revised March 21, 2007. Accepted March 30, 2007

## Introduction

Sleep disturbances with a prevalence that ranges from 74% to 98% (Parkkinen *et al.*, 2005; Mochizuki *et al.*, 2006) are major problems in Parkinson's disease (PD), often more disturbing than its motor symptoms. Most PD patients have daytime sleep attacks that resemble narcoleptic sleep attacks and that may be increased with the use of dopaminergic agonists, but that also occur independently of these agents (Frucht *et al.*, 1999; Arnulf *et al.*, 2000, 2002; Frucht, 2002; Arnulf, 2006; Rye, 2006; Savitt *et al.*, 2006). Many PD patients have REM sleep at sleep onset (Arnulf *et al.*, 2002; Onofrj *et al.*, 2003). REM sleep behaviour disorder is common in PD (Schenck and Mahowald, 1992; Gagnon *et al.*, 2002) as are hallucinations, some of which have been found to be linked to REM sleep phenomena (Arnulf *et al.*, 2000; Benbir *et al.*, 2006). Recent work has shown that the sleepiness complaints of PD typically precede the motor symptoms and intensify as the disease progresses (Abbott *et al.*, 2005; Dhawan *et al.*, 2006). All of the above symptoms are also characteristic of narcolepsy, suggesting that these symptoms of narcolepsy and PD may have a common cause.

Other symptoms that are common, but not universal, in narcolepsy are also found in PD. Eighty percent of PD patients experience sleep fragmentation resulting from frequent and prolonged awakenings (Askenasy, 2001). This may be exacerbated by the movement disorders of PD but does not appear to be entirely the result of this symptom (Stocchi *et al.*, 1998; Priano *et al.*, 2003; Barone *et al.*, 2004; Grandas and Iranzo, 2004; Arnulf, 2006). The incidence of major depression is markedly elevated in PD. Other chronic diseases are not accompanied by a similar incidence of depression (Frosh, 2006). Disrupted nighttime sleep and depression are also common in narcolepsy (Aldrich, 1998; Siegel, 1999). One element of narcolepsy that appears to be absent in PD is cataplexy.

Human narcolepsy is caused by a loss of hypocretin (Hcrt) neurons (Peyron *et al.*, 2000; Thannickal *et al.*, 2000a; Thannickal *et al.*, 2000b, 2003). Measurement of Hcrt in the CSF of PD patients has produced inconsistent results. Some studies have reported abnormally low levels, whereas others have reported values in the normal range (Mignot *et al.*, 2002; Overeem *et al.*, 2002; Drouot *et al.*, 2003; Yasui *et al.*, 2006). We have reported that Hcrt levels rise by as much as 100% when dogs or cats play, as compared to levels in quiet waking (Kiyashchenko *et al.*, 2002; Wu *et al.*, 2002). These findings and other similar findings suggest that any reduction in Hcrt level in PD may be secondary to the reduced movement caused by PD, rather than resulting from primary pathology of the Hcrt system. It has been speculated that the loss of dopamine neurons may be responsible for the sleepiness symptoms of PD (Dzirasa *et al.*, 2006), but this does not appear to explain the early onset of these symptoms nor their striking similarity to those of narcolepsy. Only by examining the Hcrt system directly can we determine if Hcrt cells are damaged in PD.

## Materials and methods

The hypothalamus of 11 PD (mean age  $79 \pm 4$ ) and 5 normal (mean age  $77 \pm 3$ ) brains was examined (Table 1). Details of the sleep quality of the PD patients and controls were not available, although other reports cited above demonstrate that a high percentage of PD patients have sleep abnormalities. Brains were fixed in 10% buffered formalin containing 0.1M phosphate buffer (pH = 7.4). The hypothalamus was cut into 40  $\mu$ m sections. Sections were immunostained for hypocretin (Hcrt-1), melanin concentrating hormone (MCH), alpha synuclein and glial fibrillary acidic protein (GFAP). The substantia nigra of 10 PD brains and 7 normal brains were used for the study of neuromelanin pigmented cell loss. The severity of Parkinson's disease was assessed using the Hoehn and Yahr scale (Hoehn and Yahr, 2001). The level of neuropathology was assessed using the Braak staging criteria (Braak *et al.*, 2003). Cell number, distribution and size were determined with stereology techniques on a one in eight series. All values are reported as mean and SEM. Comparisons were made using the *t*-test.

## Hcrt, MCH and alpha synuclein immunohistochemistry

The sections were treated with 0.5% sodium borohydride in PBS for 30 min and washed with PBS, and then incubated for 30 min in 0.5% H<sub>2</sub>O<sub>2</sub> for blocking of endogenous peroxidase activity. For antigen retrieval, sections were heated for 30 min at 80°C in a water bath with 10 mM sodium citrate (pH 8.5) solution. The sections were cooled to room temperature in sodium citrate and washed with PBS. Water bath heating produces less tissue damage and more uniform antigen retrieval than other heating techniques (Jiao *et al.*, 1999). After thorough washing with PBS the sections were placed for 2 h in 1.5% normal goat serum in PBS and incubated for 72 h at 4°C with a 1 : 2000 dilution of Hcrt-1 (Orexin-A, Calbiochem, San Diego, CA). Sections were then incubated in a secondary antibody (biotinylated goat anti-rabbit IgG; Vector Laboratories, Burlingame, CA) followed by avidin–biotin peroxidase (ABC Elite Kit; Vector laboratories), for 2 h each at room temperature. The tissue-bound peroxidase was visualized by a diaminobenzidine reaction (Vector laboratories). Adjacent series of sections were immunostained for MCH (1 : 20 000, polyclonal rabbit anti-melanin concentrating hormone, Phoenix Pharmaceuticals, Inc., Belmont, CA). Pretreatment and staining was carried out as described for Hcrt staining. Another series of one in twenty-four sections were used for  $\alpha$ -synuclein staining (1 : 10000, mouse anti-alpha synuclein monoclonal antibody, Chemicon International, Temecula, CA). Sections were then incubated in a secondary antibody (biotinylated goat anti-mouse IgG; Vector Laboratories) followed by avidin–biotin peroxidase (ABC Elite Kit; Vector laboratories), for 2 h each at room temperature. The tissue-bound peroxidase was visualized by a diaminobenzidine reaction (Vector Laboratories).

## Double immunolabelling

After antigen retrieval treatment, sections immunohistochemically stained for orexin and  $\alpha$ -synuclein were incubated with a mixture of primary antibodies for orexin-A (1 : 2000) and  $\alpha$ -synuclein (1 : 10000) for 72 h at 4°C. After being rinsed, sections were sequentially incubated in biotinylated goat anti-mouse IgG (Vector Laboratories) for  $\alpha$ -synuclein or biotinylated goat anti-rabbit IgG (Vector Laboratories) for Orexin A and followed by avidin–biotin peroxidase (ABC Elite Kit; Vector Laboratories)

**Table 1** Clinical data of Parkinson's and control subjects, and characteristics of Hcrt and MCH cells

| Subjects    | Age | Sex | No of Hcrt cells      | Hcrt cell size area ( $\mu\text{m}^2$ ) | No of MCH cells | MCH cell size area ( $\mu\text{m}^2$ ) | Clinical diagnosis          |                                    |                                  |                  |                                              |
|-------------|-----|-----|-----------------------|-----------------------------------------|-----------------|----------------------------------------|-----------------------------|------------------------------------|----------------------------------|------------------|----------------------------------------------|
| Controls    |     |     |                       |                                         |                 |                                        |                             |                                    |                                  |                  |                                              |
| C-A         | 61  | M   | 65833                 | 408.48                                  | 131616          | 409.15                                 | Pneumonia, testicular tumor |                                    |                                  |                  |                                              |
| C-B         | 78  | M   | 68932                 | 312.41                                  | 123332          | 407.95                                 | Non neuronal                |                                    |                                  |                  |                                              |
| C-C         | 81  | F   | 83330                 | 355.67                                  | 138425          | 388.65                                 | Cerebrovascular             |                                    |                                  |                  |                                              |
| C-D         | 85  | F   | 79219                 | 309.71                                  | 130840          | 346.69                                 | Cancer – adenocarcinoma     |                                    |                                  |                  |                                              |
| C-E         | 82  | M   | 80632                 | 379.42                                  | 137325          | 436.34                                 | Cerebrovascular             |                                    |                                  |                  |                                              |
| C-F         | 73  | F   | only substantia nigra |                                         |                 |                                        | Breast cancer               |                                    |                                  |                  |                                              |
| C-G         | 80  | M   | only substantia nigra |                                         |                 |                                        | Cancer – renal              |                                    |                                  |                  |                                              |
| Parkinson's |     |     |                       |                                         |                 |                                        |                             |                                    |                                  |                  |                                              |
|             |     |     |                       |                                         |                 |                                        |                             | Clin. Stage (Hoehn and Yahr, 2001) | Path. Stage (Braak et al., 2003) | Duration (years) | Medications                                  |
| PD-A        | 85  | F   | 58124                 | 340.07                                  | 120250          | 338.30                                 | PD                          | I                                  | 3                                | 20               | n/a-                                         |
| PD-B        | 68  | M   | 59728                 | 347.44                                  | 98924           | 336.85                                 | PD, dysphagia, dementia     | II                                 | 4                                | 23               | Sinemet, bromocriptine, dopamine.            |
| PD-C        | 77  | M   | 55505                 | 318.68                                  | 110555          | 392.45                                 | PD, Alzheimer's             | II                                 | 3                                | 18.5             | bromocriptine, Sinemet, Parlodel.            |
| PD-D        | 70  | F   | 53374                 | 347.39                                  | 79582           | 440.46                                 | PD                          | III                                | 3                                | 4                | Sinemet                                      |
| PD-E        | 81  | M   | 44266                 | 306.61                                  | 69732           | 373.01                                 | PD                          | III                                | 4                                | 13               | Sinemet, Parlodel                            |
| PD-F        | 62  | M   | 46800                 | 304.49                                  | 71466           | 335.61                                 | PD                          | IV                                 | 3                                | 5                | n/a                                          |
| PD-G        | 90  | M   | 45600                 | 360.45                                  | 77600           | 413.50                                 | PD, Alzheimer's             | IV                                 | 4                                | 5                | Sinemet                                      |
| PD-H        | 97  | F   | 39642                 | 297.49                                  | 62329           | 330.46                                 | PD, basilar vasculature     | IV                                 | 4                                | 12               | Sinemet                                      |
| PD-I        | 62  | M   | 29716                 | 335.98                                  | 78571           | 341.44                                 | PD                          | IV                                 | 4                                | 9                | Sinemet, Permax                              |
| PD-J        | 103 | F   | 25866                 | 342.41                                  | 32400           | 401.08                                 | PD                          | V                                  | 6                                | 21               | n/a                                          |
| PD-K        | 67  | M   | 31742                 | 345.47                                  | 40176           | 415.48                                 | PD, strokes                 | V                                  | 5                                | 19               | Sinemet, Eldepryl, Requip, Mirapex, Provigil |
| PD-L        | 86  | F   | only substantia nigra |                                         |                 |                                        | PD                          | II                                 | n/a                              | 11               | Sinemet, Permax, Eldepryl                    |

Note: Clin. = clinical, Path. = pathological.

for 2 h at room temperature. The final product of  $\alpha$ -synuclein was visualized with nickel-DAB solution (Vector Laboratories). The color of  $\alpha$ -synuclein immunohistochemical products was black. The hypocretin immunohistochemical products were visualized with DAB, which had a yellow–brown colour.

### GFAP immunohistochemistry

For GFAP staining, sections were immunostained with a 1:2000 dilution of primary polyclonal rabbit anti-GFAP antibody (DAKO, Carpinteria, CA). Antigen retrieval was not required for GFAP staining. After a hydrogen peroxide treatment and blocking serum, the sections were immunostained with GFAP antibody followed by biotinylated goat anti-rabbit secondary antibody, and an avidin–biotin–HRP complex (Vectastain ABC kit, Vector Laboratories). Incubation times were 24 h (at 4°C) for the primary antibody, 30 min (at room temperature) for the secondary antibody, and 1 h (at room temperature) for the avidin–biotin–HRP complex. Sections were treated with the DAB reaction (Vector Laboratories).

### Immunohistochemistry in substantia nigra

Substantia nigra of 10 PD brains and 7 neurologically normal brains were used (Table 1). The substantia nigra were cut into 40- $\mu$ m thick coronal sections. Haematoxylin and eosin (FD Neurotechnologies Inc, Baltimore, MD) staining were used for the identification of neuromelanin pigmented cells. A one in twenty-four series of sections was stained for GFAP and alpha synuclein immunohistochemistry, with the same procedure used for the hypothalamic sections.

Control sections from each brain were processed without the primary antibody and did not show staining. Brain regions and nuclei were identified using the 'Atlas of the Human Brain' (Mai *et al.*, 2004). Digital image acquisition was carried out with a Micro Fire camera (Optronics, Goleta, CA) and imported to the Corel Draw program. Contrast and brightness were corrected.

### Quantitative analysis

Hcrt and MCH cell number and distribution were determined with stereological techniques on a one in eight series of sections through the complete hypothalamus. We used a Nikon E600 microscope with three axis motorized stage, video camera, NeuroLucida interface and StereoInvestigator software (MicroBrightfield Corp., Colchester, Vermont). To find out whether alpha synuclein was colocalized with either Hcrt or MCH cells, we used NeuroLucida mapping of the double immunolabelled sections.

The density of GFAP cells in the thalamus and posterior hypothalamus was calculated as the number of cells per unit area ( $\text{mm}^2$ ). After delineating the nucleus, we used  $250 \times 250 \mu\text{m}$  as the counting frame size for random sampling with stereological procedures. All values of each nucleus were calculated for each subject. These were pooled to give means and SEM for each region and each group.

To calculate the percentage loss of neuromelanin pigmented cells in the substantia nigra, we used NeuroLucida mapping of each section stained with haematoxylin and eosin. The numbers of neuromelanin pigmented cells of PD brains were compared with matching sections of normals and the percentage loss was calculated.

The 'nucleator probe' in the Stereology program was used to estimate the mean cross-sectional area of the Hcrt, MCH and neuromelanin pigmented cells. Neurons with a clear nucleus were chosen for analysis. The nucleator probe was used with the optical fractionator and stereology procedures for systematic random sampling to identify cells (Gundersen, 1988). In the sampling results, the volume estimate associated with each cell was displayed, along with the average volume for the group of cells measured. A total of 606 Hcrt cells from normal ( $n=5$ ) and 702 cells from PD ( $n=11$ ) were measured. For MCH a total of 1032 ( $n=5$ ) from normal and 1109 ( $n=11$ ) from PD were measured. In the case neuromelanin pigmented cells, 1986 cells from normal ( $n=7$ ) and 1518 cells from PD ( $n=10$ ) were measured.

## Results

### Hcrt and MCH cell loss

We found an increasing loss of hypocretin cells with disease progression (Figs 1 and 2) as measured by the Hoehn and Yahr rating scale (Hoehn and Yahr, 2001). Similarly, there was higher loss of MCH cells with disease severity (Figs 2 and 3). Hcrt and MCH cells were lost throughout the A–P extent of their hypothalamic distributions (Fig. 2C). The percentage loss of Hcrt cells was minimal in stage I (23%) and was maximal in stage V (62%). Similarly, the percentage loss of MCH cells was lowest in stage I (12%) and was highest in stage V (74%). There was a significant increase ( $P=0.0006$ ,  $t=4.25$ ,  $df=15$ ) in the size of neuromelanin containing cells in PD patients as has been reported (Cabello *et al.*, 2002), but no difference in the size of surviving Hcrt ( $P=0.18$ ,  $t=1.39$ ,  $df=14$ ) and MCH ( $P=0.28$ ,  $t=1.39$ ,  $df=14$ ) cells relative to control (Fig. 2B).

### Distribution of alpha synuclein, gliosis and neuromelanin pigmented cell loss

Alpha synuclein immunostaining showed a pattern of Lewy body formation in different stages of PD (Fig. 4A). We did not see Lewy bodies in surviving Hcrt (Fig. 4B and D) or MCH cells (Fig. 4C and E), but they were present in surviving neuromelanin containing cells of the substantia nigra (Fig. 4F). We hypothesize that these cells either die by a different mechanism than neuromelanin cells or that they die more rapidly, leaving few in an intermediate state to be observed. There was 50–75% loss of neuromelanin pigmented cells in the substantia nigra (Fig. 5A) compared to control. In the hypothalamus, we saw increasing levels of GFAP with disease progression in PD (Fig. 5B and C).

### Clinicopathological correlations

We used the pathological variables (number of Hcrt, MCH and neuromelanin pigmented cells) and the clinical variables (severity and duration of disease) for the correlation study (Table 2). We found an increasing loss of hypocretin cells with disease progression as measured by the Hoehn and Yahr rating scale (Hoehn and Yahr, 2001).



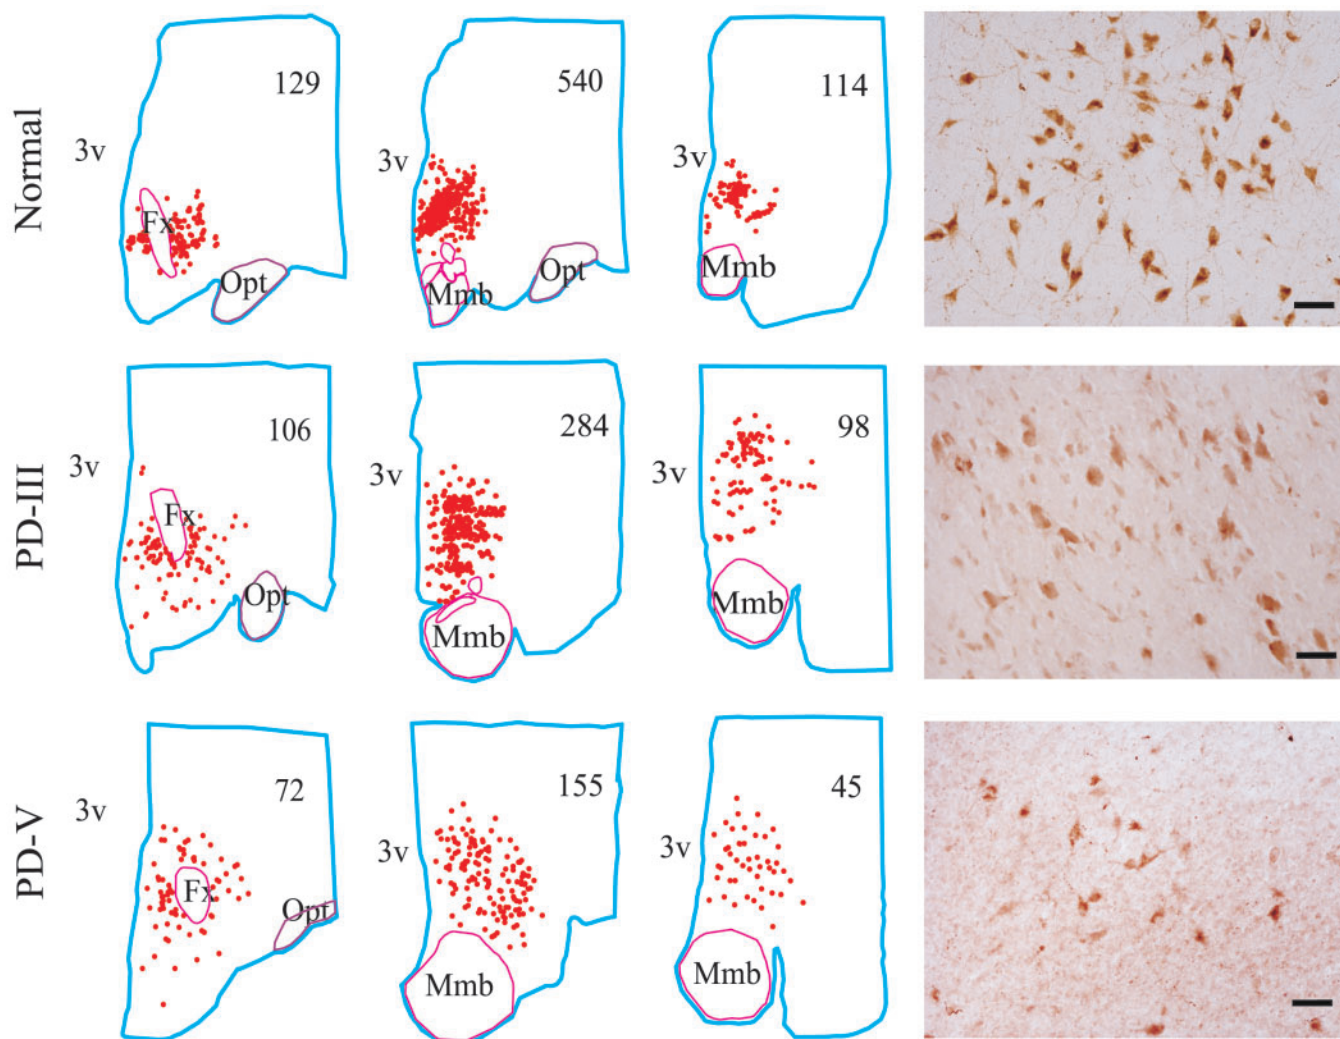

**Fig. 1** Distribution of Hcrt cells in normal and across PD stages. The clinical stages of PD are based on Hoehn and Yahr criteria. The cell distribution and count from a section of anterior, middle and posterior part of the hypothalamus were mapped from a normal, stage III and stage V of PD brains. The cell counts are listed for each section. The number of Hcrt cells is decreased with severity of the disease. 3v—third ventricle, Fx—fornix, Mmb—mammillary body, Opt—optic tract. Scale bars—50  $\mu$ m.

Similarly, MCH cell loss was correlated with disease stage but not with disease duration. In contrast, the loss of neuromelanin pigmented cells was not correlated with disease stage but was with disease duration, extending the conclusions of a recent study which showed that alpha synuclein pathology in neuromelanin cells does not correlate well with PD symptoms (Parkkinen *et al.*, 2005). The Braak stages were correlated with percentage loss of neuromelanin pigmented cells, MCH, Hcrt and the Hoehn and Yahr staging (Table 3).

## Discussion

The early loss of Hcrt cells may be related to the early appearance of narcolepsy-like signs in PD patients. This loss

is occurring prior to the onset of drug treatment in many PD patients. The loss of Hcrt cells may also explain the orthostatic hypotension reported in PD (Hoehn and Yahr, 2001) which parallels the low BP seen in Hcrt null mutant mice (Kayaba *et al.*, 2003) and the abnormal regulation of body temperature that has been reported in both PD (Elliott *et al.*, 1974) and Hcrt null mutant mice (Mochizuki *et al.*, 2006).

The sleepiness experienced by PD patients may not be solely attributable to the loss of Hcrt neurons. It may be at least partially due to the other neurodegenerative changes in PD, including the loss of dopamine, norepinephrine and serotonin neurons (Braak *et al.*, 2003, 2004), all of which have alerting properties (Siegel, 1990; Wisor *et al.*, 2001; Aston-Jones and Cohen, 2005; Siegel, 2005). The role of the

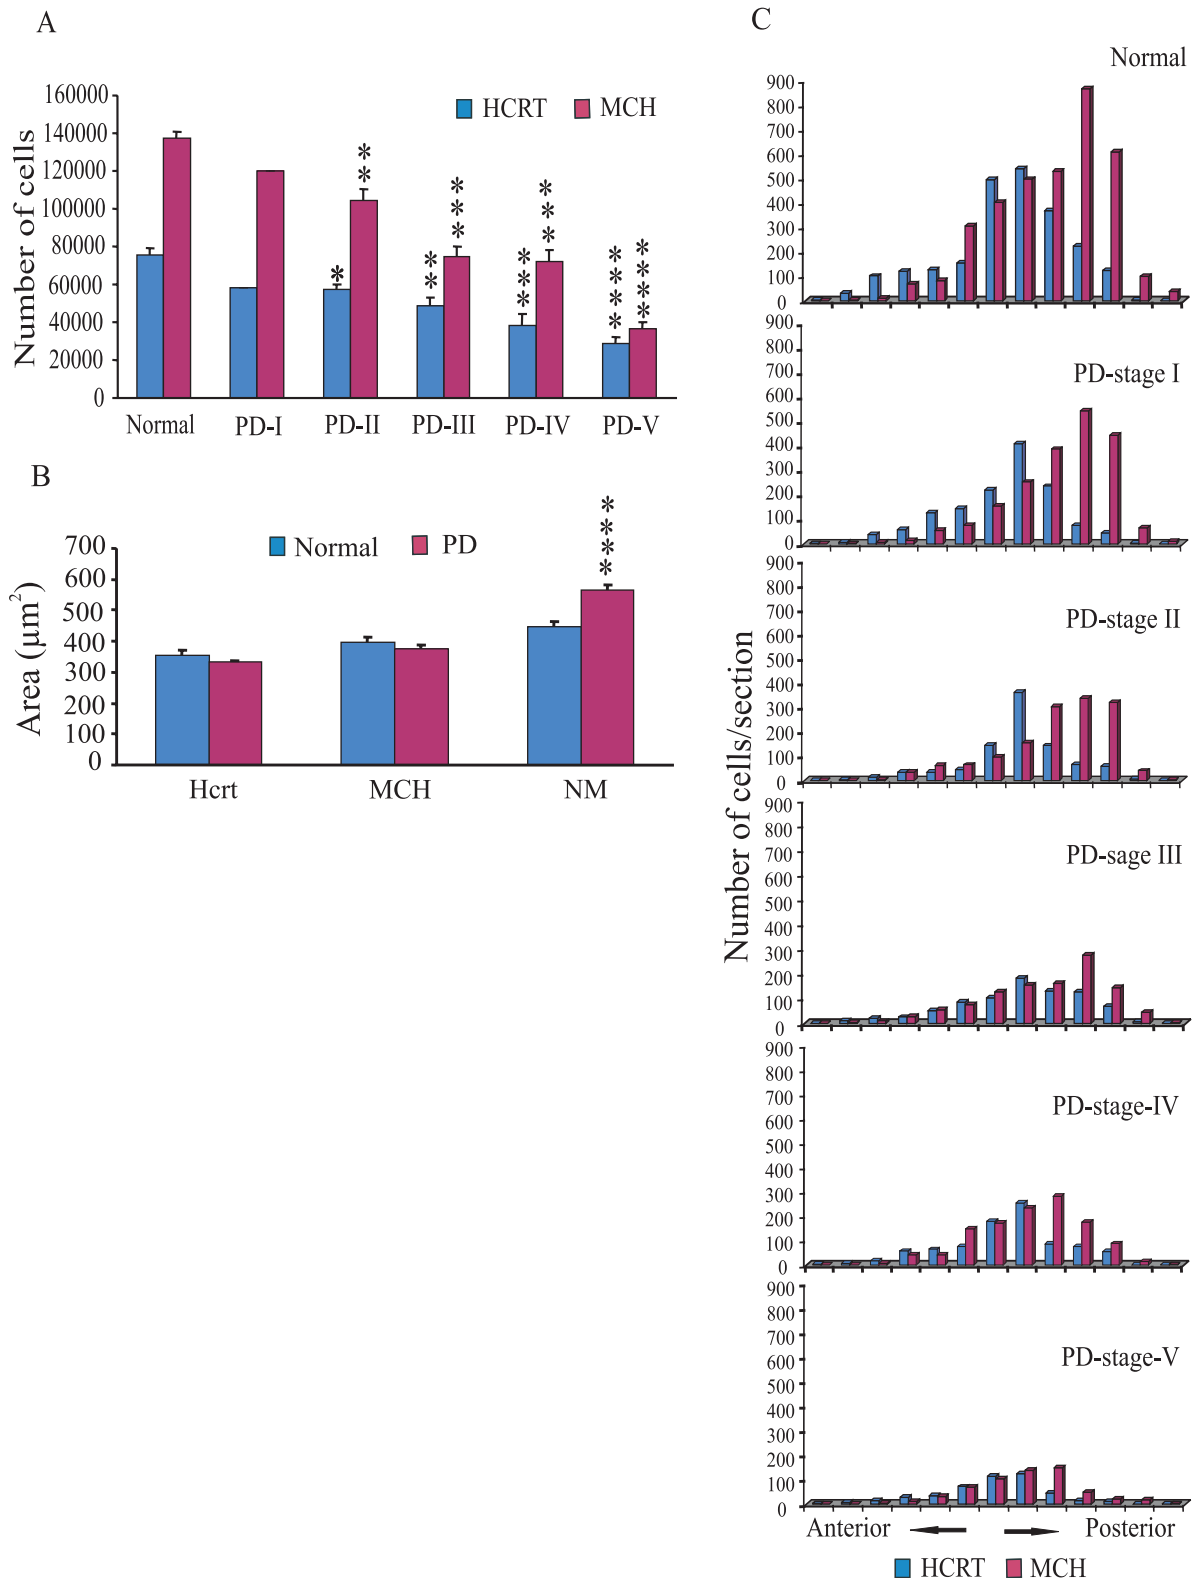

**Fig. 2** Hcrt and MCH pathology in different stages of PD. **(A)** The total number of Hcrt and MCH cells in normal and PD-I, PD-II, PD-III, PD-IV and PD-V. The values are compared to cell numbers in the normal brains. **(B)** The size of the Hcrt, MCH and neuromelanin pigmented cells estimated by nucleator method. Hcrt and MCH cells in PD did not differ in size from those in normal brains. Neuromelanin pigmented cells showed hypertrophy (27%) compared with normal cells. **(C)** Hcrt and MCH cells were mapped in individual sections from anterior to posterior hypothalamus with 1200 µm section interval. One brain from a normal and one from each stage (Hoehn and Yahr, I–V) of PD were used for NeuroLucida mapping. There was a generalized loss of Hcrt and MCH cells with severity of the disease. \**P* < 0.05, \*\**P* < 0.01, \*\*\**P* < 0.001, \*\*\*\**P* < 0.0001, Student's *t*-test.

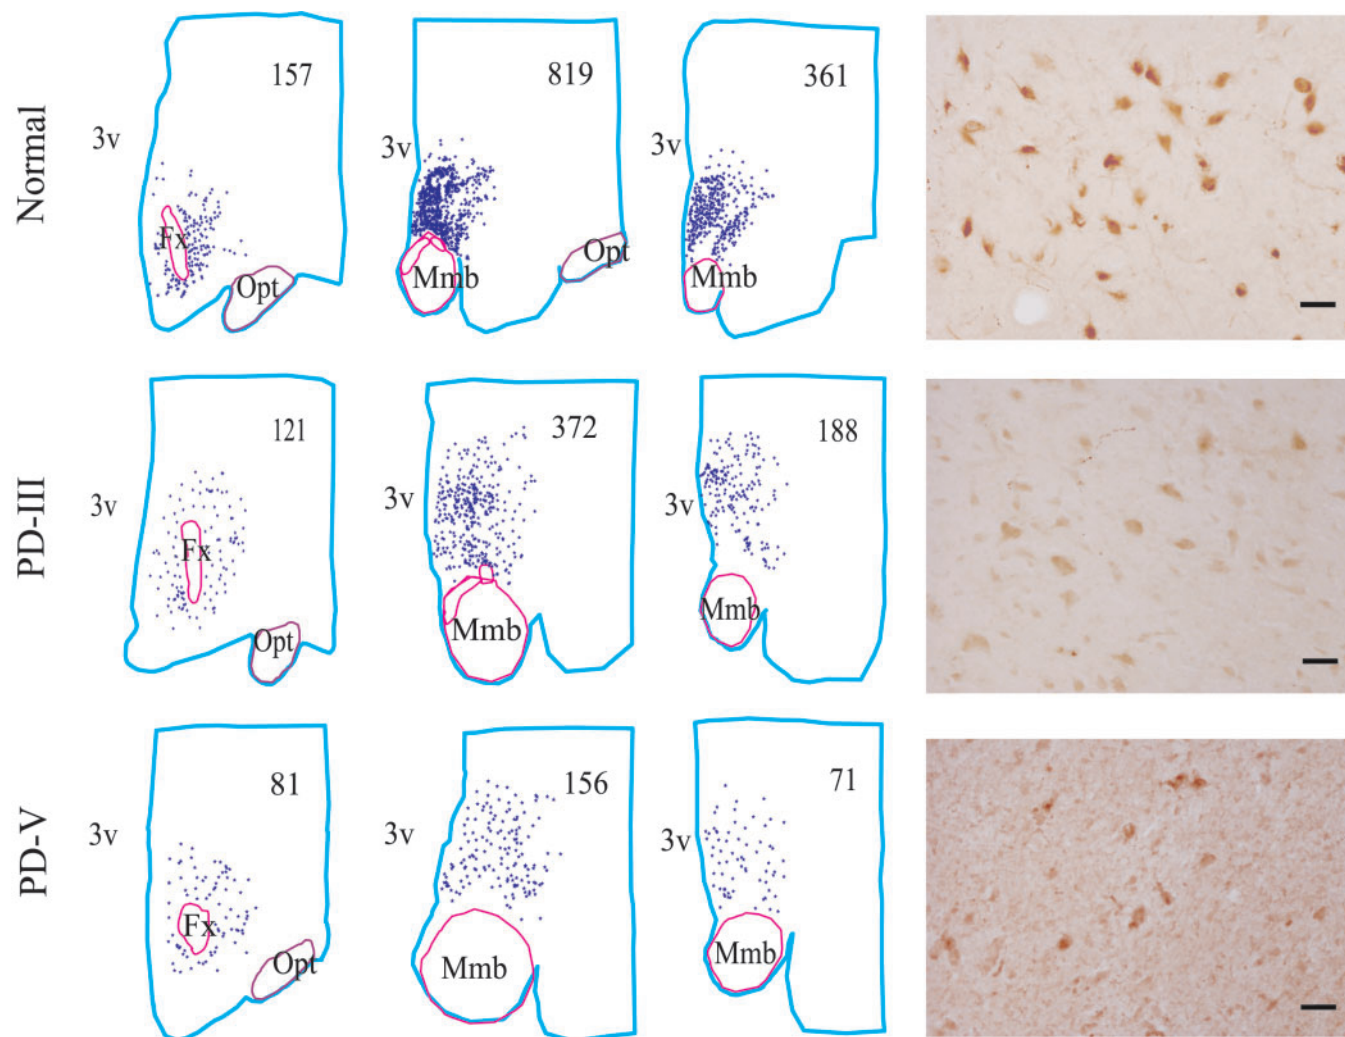

**Fig. 3** Distribution of MCH cells in normal and Parkinson stages. Cell counts are listed in each section. The number of MCH cell was decreased with severity of the disease. The abbreviations are same as in Fig. 1. Scale bars—50  $\mu$ m.

loss of MCH cells reported here in the sleepiness of PD is unclear. In contrast to the maximal activity of Hcrt cells in waking (Lee *et al.*, 2005; Mileykovskiy *et al.*, 2005), MCH cells appear to be maximally active in sleep and are reciprocally connected with Hcrt neurons (Verret *et al.*, 2003; Alam *et al.*, 2005; Modirrousta *et al.*, 2005; Torterolo *et al.*, 2006). The loss of MCH neurons in PD may therefore alter the expression of symptoms produced by loss of Hcrt neurons, which are selectively lost in narcolepsy.

If the loss of Hcrt cells is responsible for the symptoms common to both disorders, PD's narcoleptic like symptoms may respond to the same treatments found effective in narcolepsy. Especially promising would be treatment with hypocretin or hypocretin analogs (Stocchi *et al.*, 1998; John *et al.*, 2000, 2003; Siegel and Boehmer, 2006). The significant correlations that we find between the loss of Hcrt and MCH neurons and the clinical stage of PD, in contrast to the lack of a relationship of similar

strength between loss of neuromelanin containing cells and the clinical symptoms of PD, suggests a previously unappreciated relationship between hypothalamic dysfunction and the time course of the overall clinical picture of PD (Langston and Forno, 1978; Kremer and Bots, 1993). The demonstrated relation between Hcrt release and mood (Kiyashchenko *et al.*, 2002; Wu *et al.*, 2002; Siegel, 2004; Mileykovskiy *et al.*, 2005; Siegel and Boehmer, 2006) encourages the investigation of therapies targeted at reversing Hcrt dysfunction to treat depression in PD.

### Acknowledgements

Tissue specimens were obtained from the Human Brain and Spinal Fluid Resource Center, West Los Angeles Healthcare Center, Los Angeles, CA. Supported by NS14610, HL41370, MH64109, NS42566 (YYL) and the Medical Research



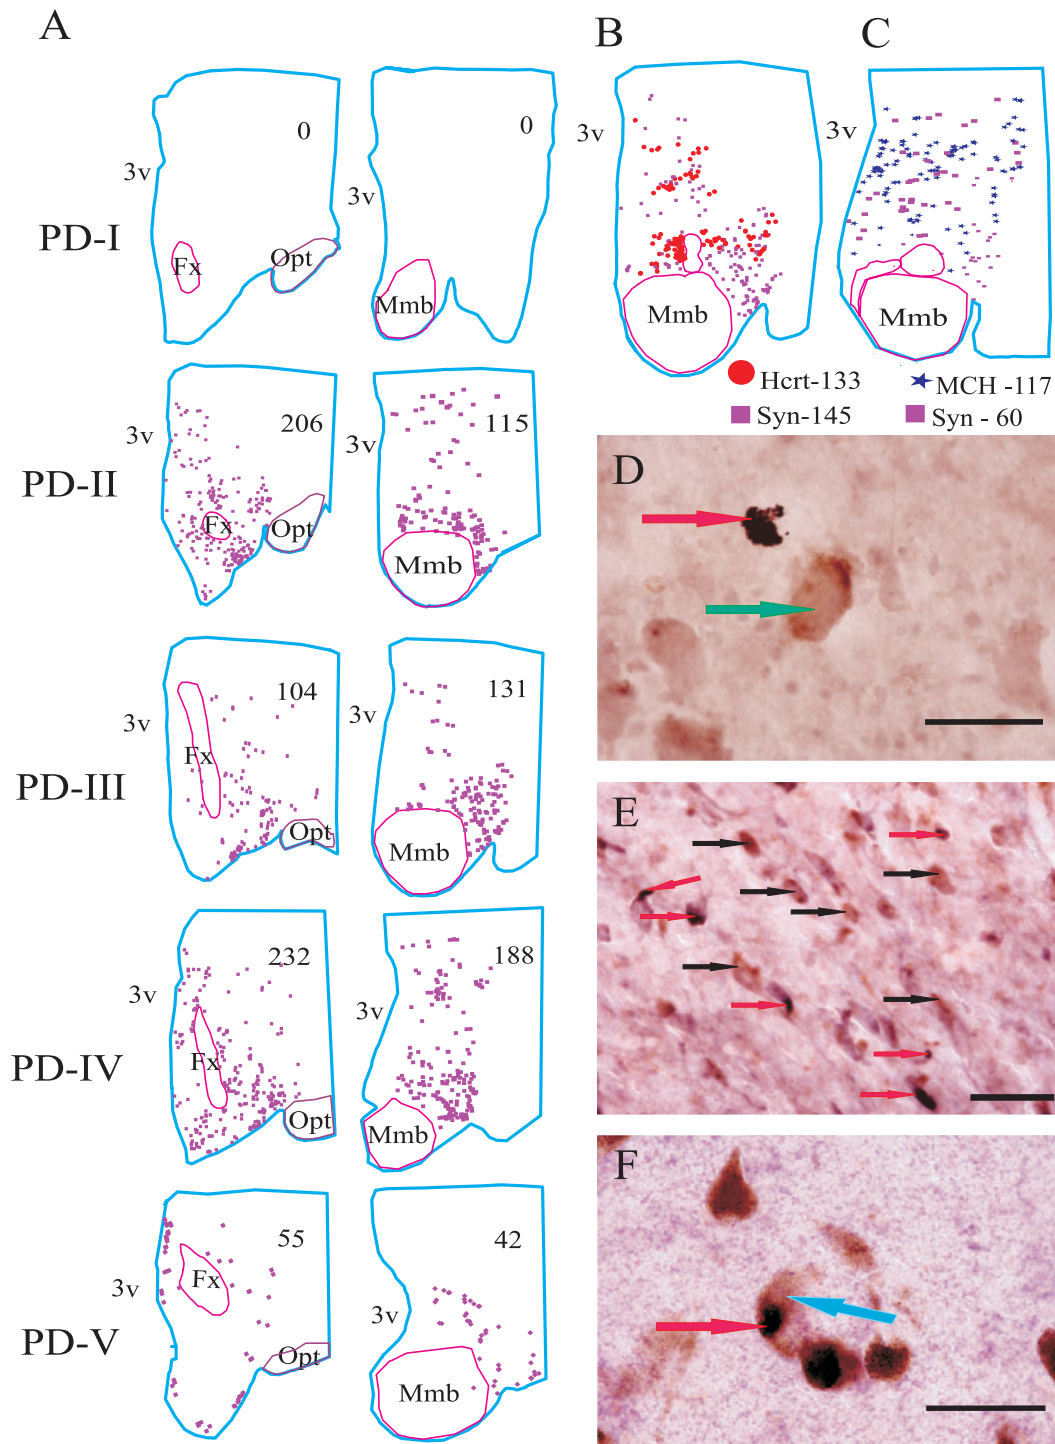

**Fig. 4** Distribution of alpha synuclein in the hypothalamus in different stages of PD. **(A)** Neurolucida mapping of alpha synuclein in PD stages with single immunostaining. **(B)** Mapping of Hcrt and alpha synuclein in double-labelled section. **(C)** Mapping of MCH and alpha synuclein in double-labelled section. Alpha synuclein was not colocalized with Hcrt and MCH cells (**D** and **E**), but it was colocalized with neuromelanin pigmented cells in substantia nigra (**F**). Arrows: red—alpha synuclein, green—Hcrt cell, black—MCH cells and blue—neuromelanin pigmented cell. Scale bars—50  $\mu$ m.



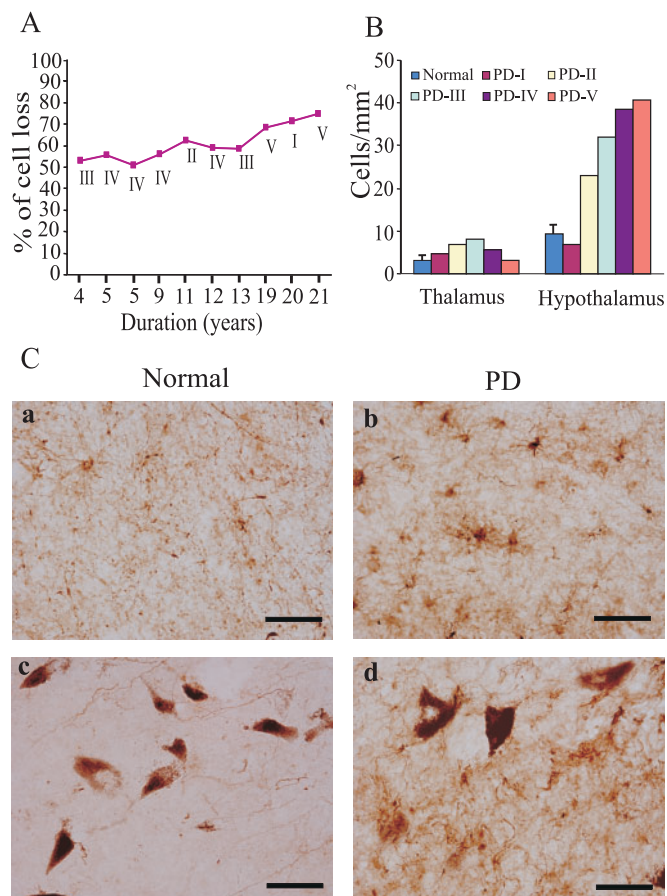

**Fig. 5** Gliosis and neuromelanin pigmented cell loss in PD. (A) The percentage loss of neuromelanin pigmented cell loss in the substantia nigra was correlated with duration of the disease. (B) The number of glial fibrillary acidic protein-labelled astrocytes (GFAP) in the thalamus and posterior hypothalamus. (C) GFAP in the hypothalamus of normal (a) and PD (b). GFAP density in the substantia nigra of normal (c) and PD (d) brain. The number of GFAP-labelled astrocytes were increased with severity of the disease. Scale bars—50  $\mu$ m.

**Table 2** Correlation analysis of Hcrt, MCH and Neuromelanin pigmented cell loss in PD with clinical stages (Hoehn and Yahr), duration and % cell loss

| Correlations                           | <i>r</i> | <i>P</i> |
|----------------------------------------|----------|----------|
| % loss of cells versus PD stages       |          |          |
| Hcrt cells and PD stages               | 0.87     | 0.0005   |
| MCH cells and PD stages                | 0.96     | 0.0001   |
| NM cells and PD stages                 | 0.03     | 0.94     |
| % loss of cells versus PD duration     |          |          |
| Hcrt cells and PD duration             | 0.35     | 0.28     |
| MCH cells and PD duration              | 0.04     | 0.90     |
| NM cells and PD duration               | 0.92     | 0.002    |
| % loss of cells versus % loss of cells |          |          |
| Hcrt cells and NM cells                | 0.45     | 0.60     |
| MCH cells and NM cells                 | 0.25     | 0.58     |
| Hcrt cells and MCH cells               | 0.83     | 0.001    |

Note: *r* = correlation; *P* = significance; NM = neuromelanin pigmented cells.

**Table 3** Correlation analysis of pathological stages (Braak et al.) in PD with Hcrt, MCH and Neuromelanin pigmented cell loss and duration

| Correlations                                 | <i>r</i> | <i>P</i> |
|----------------------------------------------|----------|----------|
| % loss of Hcrt cells and pathological stages | 0.56     | 0.06     |
| % loss of MCH cells and pathological stages  | 0.78     | 0.004    |
| % of NM cells and pathological stages        | 0.86     | 0.001    |
| Duration and pathological stages             | 0.53     | 0.09     |
| Duration and clinical stages                 | 0.09     | 0.78     |
| Pathological stages and clinical stages      | 0.71     | 0.01     |

Note: *r* = correlation; *P* = significance; NM = neuromelanin pigmented cells.

Service of the Department of Veterans Affairs. Funding to pay the Open Access publication charges for this article was provided by The National Institutes of Health.

## References

- Abbott RD, Ross GW, White LR, Tanner CM, Masaki KH, Nelson JS, et al. Excessive daytime sleepiness and subsequent development of Parkinson disease. *Neurology* 2005; 65: 1442–6.
- Alam MN, Kumar S, Bashir T, Suntsova N, Methippara MN, Szymusiak R, et al. GABA-mediated control of hypocretin- but not melanin-concentrating hormone-immunoreactive neurones during sleep in rats. *J Physiol* 2005; 563: 569–82.
- Aldrich MS. Diagnostic aspects of narcolepsy. *Neurology* 1998; 50: S2–7.
- Arnulf I. Sleep and wakefulness disturbances in Parkinson's disease. *J Neural Transm Suppl* 2006; 70: 357–60.
- Arnulf I, Bonnet AM, Damier P, Bejjani BP, Seilhean D, Derenne JP, Agid Y, et al. Hallucinations, REM sleep, and Parkinson's disease: a medical hypothesis. *Neurology* 2000; 55: 281–8.
- Arnulf I, Konofal E, Merino-Andreu M, Houeto JL, Mesnage V, Welter ML, et al. Parkinson's disease and sleepiness: an integral part of PD. *Neurology* 2002; 58: 1019–24.
- Askenasy JJ. Approaching disturbed sleep in late Parkinson's Disease: first step toward a proposal for a revised UPDRS. *Parkinsonism Relat Disord* 2001; 8: 123–31.
- Aston-Jones G, Cohen JD. Adaptive gain and the role of the locus coeruleus-norepinephrine system in optimal performance. *J Comp Neurol* 2005; 493: 99–110.
- Barone P, Amboni M, Vitale C, Bonavita V. Treatment of nocturnal disturbances and excessive daytime sleepiness in Parkinson's disease. *Neurology* 2004; 63: S35–8.
- Benbir G, Ozekmekci S, Cinar M, Beskardes F, Apaydin H, Erginoz E. Features associated with the development of hallucinations in Parkinson's disease. *Acta Neurol Scand* 2006; 114: 239–43.
- Braak H, Del TK, Rub U, De Vos RA, Jansen Steur EN, Braak E. Staging of brain pathology related to sporadic Parkinson's disease. *Neurobiol Aging* 2003; 24: 197–211.
- Braak H, Ghebremedhin E, Rub U, Bratzke H, Del TK. Stages in the development of Parkinson's disease-related pathology. *Cell Tissue Res* 2004; 318: 121–34.
- Cabello CR, Thune JJ, Pakkenberg H, Pakkenber B. Ageing of substantianigra in humans: cell loss may be compensated by hypertrophy. *Neurobiol Appl Neurobiol* 2002; 28: 283–91.
- Dhawan V, Healy DG, Pal S, Chaudhuri KR. Sleep-related problems of Parkinson's disease. *Age Ageing* 2006; 35: 220–8.
- Drouot X, Moutereau S, Nguyen JP, Lefaucheur JP, Creange A, Remy P, et al. Low levels of ventricular CSF orexin/hypocretin in advanced PD. *Neurology* 2003; 61: 540–3.

- Dzirasa K, Ribeiro S, Costa R, Santos LM, Lin SC, Grosmark A, et al. Dopaminergic control of sleep-wake states. *J Neurosci* 2006; 26: 10577–89.
- Elliott K, Cote LJ, Frewin DB. Vascular responses in the hands of Parkinson's disease patients. *Neurology* 1974; 24: 857–62.
- Frosh WA. Psychiatric Issues in Parkinson's disease: a practical guide. *Am J Psychiatry* 2006; 163: 1456–7.
- Frucht S. Sudden-onset sleep in Parkinson disease. *JAMA* 2002; 287: 2076–77.
- Frucht S, Rogers JD, Greene PE, Gordon MF, Fahn S. Falling asleep at the wheel: motor vehicle mishaps in persons taking pramipexole and ropinirole. *Neurology* 1999; 52: 1908–10.
- Gagnon JF, Bedard MA, Fantini ML, Petit D, Panisset M, Rompre S, et al. REM sleep behavior disorder and REM sleep without atonia in Parkinson's disease. *Neurology* 2002; 59: 585–9.
- Grandas F, Iranzo A. Nocturnal problems occurring in Parkinson's disease. *Neurology* 2004; 63: 58–11.
- Gundersen HJ. The nucleator. *J Microscopy* 1988; 151: 3–21.
- Hoehn MM, Yahr MD. Parkinsonism: onset, progression, and mortality. 1967. *Neurology* 2001; 57: S11–26.
- Jiao Y, Sun Z, Lee T, Fusco FR, Kimble TD, Meade CA, et al. A simple and sensitive antigen retrieval method for free floating and slide mounted tissue sections. *J Neurosci Meth* 1999; 93: 149–62.
- John J, Wu M-F, Kodama T, Siegel JM. Intravenously administered hypocretin-1 alters brain amino acid release: an *in vivo* microdialysis study in rats. *J Physiol (Lond)* 2003; 548.2: 557–62.
- John J, Wu MF, Siegel JM. Systemic administration of hypocretin-1 reduces cataplexy and normalizes sleep and waking durations in narcoleptic dogs. *Sleep Res Online* 2000; 3: 23–8.
- Kayaba Y, Nakamura A, Kasuya Y, Ohuchi T, Yanagisawa M, Komuro I, et al. Attenuated defense response and low basal blood pressure in orexin knockout mice. *Am J Physiol Regul Integr Comp Physiol* 2003; 285: R581–93.
- Kiyashchenko LI, Mileykovskiy BY, Maidment N, Lam HA, Wu MF, John J, et al. Release of hypocretin (orexin) during waking and sleep states. *J Neurosci* 2002; 22: 5282–6.
- Kremer HP, Bots GT. Lewy bodies in the lateral hypothalamus: do they imply neuronal loss? *Mov Disord* 1993; 8: 315–20.
- Langston JW, Forno LS. The hypothalamus in Parkinson disease. *Ann Neurol* 1978; 3: 129–33.
- Lee MG, Hassani OK, Jones BE. Discharge of identified orexin/hypocretin neurons across the sleep-waking cycle. *J Neurosci* 2005; 25: 6716–20.
- Mai JK, Assheur J, Paxinos G. Atlas of the human brain. Elsevier Academic Press; 2004.
- Mignot E, Lammers GJ, Ripley B, Okun M, Nevsimalova S, Overeem S, et al. The role of cerebrospinal fluid hypocretin measurement in the diagnosis of narcolepsy and other hypersomnias. *Arch Neurol* 2002; 59: 1553–62.
- Mileykovskiy BY, Kiyashchenko LI, Siegel JM. Behavioral correlates of activity in identified hypocretin/orexin neurons. *Neuron* 2005; 46: 787–98.
- Mochizuki T, Klerman EB, Sakurai T, Scammell TE. Elevated body temperature during sleep in orexin knockout mice. *Am J Physiol Regul Integr Comp Physiol* 2006; 291: R533–40.
- Modirrousta M, Mainville L, Jones BE. Orexin and MCH neurons express c-Fos differently after sleep deprivation vs. recovery and bear different adrenergic receptors. *Eur J Neurosci* 2005; 21: 2807–16.
- Onofrij M, Luciano AL, Iacono D, Thomas A, Stocchi F, Papola F, et al. HLA typing does not predict REM sleep behaviour disorder and hallucinations in Parkinson's disease. *Mov Disord* 2003; 18: 337–40.
- Overeem S, van Hilten JJ, Ripley B, Mignot E, Nishino S, Lammers GJ. Normal hypocretin-1 levels in Parkinson's disease patients with excessive daytime sleepiness. *Neurology* 2002; 58: 498–9.
- Parkkinen L, Kauppinen T, Pirttila T, Autere JM, Alafuzoff I. Alpha-synuclein pathology does not predict extrapyramidal symptoms or dementia. *Ann Neurol* 2005; 57: 82–91.
- Peyron C, Faraco J, Rogers W, Ripley B, Overeem S, Charnay Y, et al. A mutation in a case of early onset narcolepsy and a generalized absence of hypocretin peptides in human narcoleptic brains. *Nat Med* 2000; 6: 991–7.
- Priano L, Albani G, Brioschi A, Guastamacchia G, Calderoni S, Lopiano L, et al. Nocturnal anomalous movement reduction and sleep microstructure analysis in parkinsonian patients during 1-night transdermal apomorphine treatment. *Neurol Sci* 2003; 24: 207–8.
- Rye DB. Excessive daytime sleepiness and unintended sleep in Parkinson's disease. *Curr Neurol Neurosci Rep* 2006; 6: 169–76.
- Savitt JM, Dawson VL, Dawson TM. Diagnosis and treatment of Parkinson disease: molecules to medicine. *J Clin Invest* 2006; 116: 1744–54.
- Schenck CH, Mahowald MW. Motor dyscontrol in narcolepsy: rapid-eye-movement (REM) sleep without atonia and REM sleep behavior disorder. *Ann Neurol* 1992; 32: 3–10.
- Siegel JM. Mechanisms of sleep control. *J Clin Neurophysiol* 1990; 7: 49–65.
- Siegel JM. Narcolepsy: a key role for hypocretins (orexins). *Cell* 1999; 98: 409–12.
- Siegel JM. Hypocretin (orexin): role in normal behavior and neuropathology. *Annu Rev Psychol* 2004; 55: 125–48.
- Siegel JM. REM sleep. In: Kryger MH, Roth T, Dement WC, editors. Principles and practice of sleep medicine. Philadelphia: Elsevier Saunders; 2005. p. 120–35.
- Siegel JM, Boehmer LN. Narcolepsy and the hypocretin system—where motion meets emotion. *Nat Clin Pract Neurol* 2006; 2: 548–56.
- Stocchi F, Barbato L, Nordera G, Berardelli A, Ruggieri S. Sleep disorders in Parkinson's disease. *J Neurol* 1998; 245 (Suppl 1): S15–8.
- Thannickal TC, Moore RY, Aldrich M, Albin R, Cornford M, Siegel JM. Human narcolepsy is linked to reduced number, size and synaptic bouton density in hypocretin-2 labeled neurons. *Abstr Soc Neurosci* 2000a; 26: 2061.
- Thannickal TC, Moore RY, Nienhuis R, Ramanathan L, Gulyani S, Aldrich M, et al. Reduced number of hypocretin neurons in human narcolepsy. *Neuron* 2000b; 27: 469–74.
- Thannickal TC, Siegel JM, Moore RY. Pattern of hypocretin (orexin) soma and axon loss, and gliosis, in human narcolepsy. *Brain Pathol* 2003; 13: 340–51.
- Tortorolo P, Sampogna S, Morales FR, Chase MH. MCH-containing neurons in the hypothalamus of the cat: searching for a role in the control of sleep and wakefulness. *Brain Res* 2006; 1119: 101–14.
- Verret L, Goutagny R, Fort P, Cagnon L, Salvert D, Leger L, et al. A role of melanin-concentrating hormone producing neurons in the central regulation of paradoxical sleep. *BMC Neurosci* 2003; 4: 19.
- Wisor JP, Nishino S, Sora I, Uhl GH, Mignot E, Edgar DM. Dopaminergic role in stimulant-induced wakefulness. *J Neurosci* 2001; 21: 1787–94.
- Wu MF, John J, Maidment N, Lam HA, Siegel JM. Hypocretin release in normal and narcoleptic dogs after food and sleep deprivation, eating, and movement. *Am J Physiol Regul Integr Comp Physiol* 2002; 283: R1079–86.
- Yasui K, Inoue Y, Kanbayashi T, Nomura T, Kusumi M, Nakashima K. CSF orexin levels of Parkinson's disease, dementia with Lewy bodies, progressive supranuclear palsy and corticobasal degeneration. *J Neurol Sci* 2006; 250: 120–3.
